# Supplementary material for: Fabrication of silica/polythiophene core/shell nanospheres and their electrorheological fluid application
Source: Royal Society of Chemistry journal article supplement (doi:10.1039/b821291k), 2009-01-01
Supplement: b821291k.pdf [file b821291k.pdf]

Supplementary Material (ESI) for Soft Matter  
This journal is (c) The Royal Society of Chemistry 2009

Supplementary Information for:

## **Fabrication of Silica/Polythiophene Core/Shell Nanospheres and Their Electrorheological Fluid Application**

Jin-Yong Hong, Eunbyul Kwon and Jyongsik Jang\*

*School of Chemical and Biological Engineering, Seoul National University,  
599 Gwanangno, Gwanakgu, Seoul 151-742, Korea.*

[\*] E-mail: [jsjang@plaza.snu.ac.kr](mailto:jsjang@plaza.snu.ac.kr)

Tel.: +82-2-880-7069

Fax: +82-2-888-1604

## 1. Experimental Section

**Materials:** Ludox SM-30, HS-40 and AS-40 aqueous colloidal solutions (Aldrich) were used as templates of silica nanoparticles with the diameter of *ca.* 7, 12, and 22 nm, respectively. Iron (III) chloride (Aldrich, reagent grade, 97%) as an oxidizing agent and thiophene (Aldrich, 99 +%) as a monomer were used without further purification. Chloroform (99 %) was also obtained from Aldrich Chemical Co. For electrorheological (ER) fluid application, silicon oil (Aldrich, poly(methylphenylsiloxane), viscosity = 100 cSt) was used as a dispersing medium.

**Preparation of Oxidant-coated Silica Nanospheres:** Monodispersed silica nanospheres were prepared using Ludox SM-30, HS-40 and AS-40 aqueous solution as a source of 7 nm, 12 nm and 22 nm silica nanospheres, respectively. The colloidal silica suspension (25 g) was poured into a beaker, and distilled water (25 ml) was added. Mixture solution was stirred vigorously and FeCl<sub>3</sub> (12.5 g) was inserted in mixed solution to make the weight ratio of 0.5 FeCl<sub>3</sub>-coated silica nanospheres. FeCl<sub>3</sub> was completely dissolved and allowed to dry at room temperature in order to evaporate water.

**Fabrication of Silica/PT Core/Shell Nanospheres:** 7 nm FeCl<sub>3</sub>-coated silica nanospheres (10 g) were dispersed in chloroform (100 mL). Thiophene monomer (0.15 mL) was introduced into the reactor and the mixture was stirred for 4 hr at 60 °C. After

polymerization, the silica/PT core/shell nanospheres were washed with ethanol several times to remove residual reagent and dried under vacuum oven for ER fluids application. For 12 nm and 22 nm FeCl<sub>3</sub>-coated silica nanospheres, overall process was the same as above procedure except the amount of thiophene monomer, 0.125 mL and 0.1 mL, respectively.

***Silica/PT Core/Shell Nanospheres Characterization:*** FE-SEM images were taken with a JEOL 6700F. Photographs of energy-filtering transmission electron microscopy (EF-TEM) were obtained with a Carl Zeiss LIBRA 120. In the sample preparation, nanomaterials diluted in ethanol were cast onto copper grid. Raman spectra were recorded using a Jobin-Yvon T64000 spectrometer equipped with an Ar-ion laser beam (514.5 nm) for the optical excitation at ambient temperature. The electrical conductivity was measured by the four-probe method using a Keithley 2400 sourcemeter at room temperature.

***Investigation of Electrorheological Properties:*** The ER properties of the silica/PT core/shell nanospheres-based ER fluids were examined via a Rheometrics Mechanical Spectrometer (RMS800, Rheometric Scientific) with a parallel plate fixture of 40 mm diameter, a high-voltage generator (Trek 677B), and a temperature controller. To start a run, an ER fluid is placed between two plates with a gap of 1.00 mm, and DC voltage is applied to the plate. An electric field was applied for 3 min to obtain an equilibrium chainlike or columnar structure before applying shear. All measurements were made at a bath temperature

of  $25 \pm 0.1$  °C. The shear rate was varied from  $10^{-1}$  to  $10^3$   $s^{-1}$ , and yield stresses for the prepared ER fluids were mainly obtained under flow in a controlled shear rate (CSR) experiment.

## 2. Raman and EDAX spectra of the sample

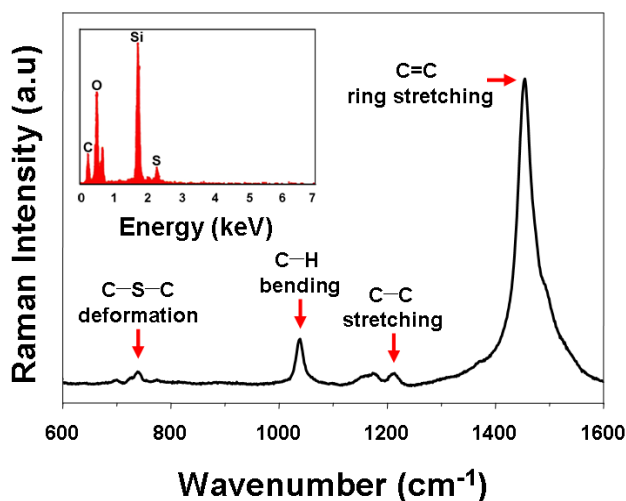

**Fig. S1** Raman spectroscopy of 11 nm silica/PT core/shell nanospheres prepared using 7 nm silica nanospheres as a core material (inset: The energy-dispersive analysis of X-ray (EDAX) spectrum of 11 nm silica/PT core/shell nanospheres).

**Fig. S1** exhibits the spectroscopic analysis of the silica/PT core/shell nanospheres. The Raman spectroscopic analysis supported effective information of the PT layer. The most intense peak appeared at 1432 cm<sup>-1</sup>, which was assigned to the symmetric C=C ring stretching vibrations of the conjugated polythiophene segments. The peaks at 1210 cm<sup>-1</sup> and 1069 cm<sup>-1</sup> were attributed to the C—C stretching and C—H bending vibrations, respectively. In addition, the peak at 760 cm<sup>-1</sup> was designated to C—S—C deformation. In addition, the energy-dispersive analysis of X-ray (EDAX) provided the composition of the silica/PT core/shell nanospheres (Fig. S1 inset). It consisted of C (7.37 %), O (47.07 %), Si (40.77 %), and S (4.79 %). The Si and O peaks originated from the silica core. The C/S composition ratio of the

silica/PT core/shell nanospheres (1.54) has good agreement with C/S ratio of conventional PT (1.50). Judging from these data, it can be concluded that silica/PT core/shell nanomaterials was successfully synthesized.

### 3. A DRIFT spectra of the sample

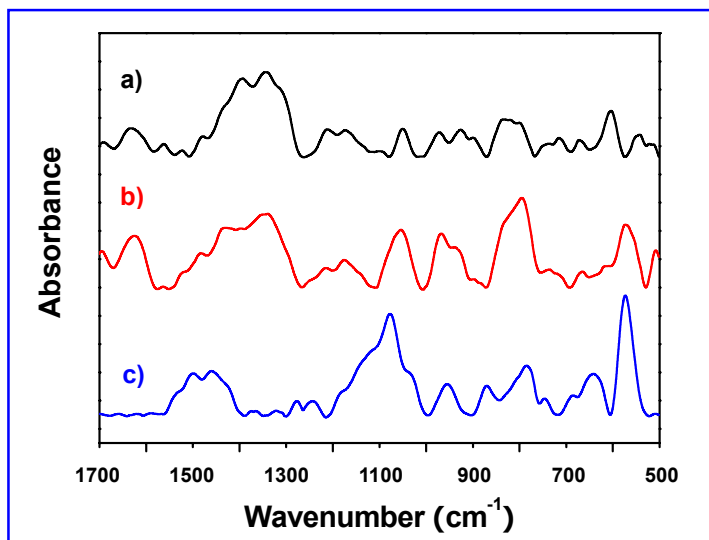

**Fig. S2** DRIFT spectra in the spectral region of 1700–500  $\text{cm}^{-1}$ ; (a) 7 nm silica nanoparticles, (b) 11 nm silica/PT core/shell nanospheres and (c) The difference spectrum (b–a).

**Fig. S2** depicts the diffuse-reflectance infrared Fourier- transform (DRIFT) spectra of pristine silica nanoparticle, silica/PT core/shell nanosphere and difference spectrum in the region of 1700–500  $\text{cm}^{-1}$ . DRIFT technique has been known as effective and powerful method for core/shell nanomaterial analysis. The difference spectrum between the silica nanoparticle and silica/PT core/shell nanosphere provides the selective information of the PT shell. The bands at 1500  $\text{cm}^{-1}$ , 1459  $\text{cm}^{-1}$ , 1263  $\text{cm}^{-1}$  and 1369  $\text{cm}^{-1}$  can be assigned to the C=C in-plane vibration mode. The characteristic peaks of silica/PT core/shell nanospheres appear at 1076  $\text{cm}^{-1}$ , 747  $\text{cm}^{-1}$  and 572  $\text{cm}^{-1}$ , which are due to the C–H out-of-plane bend, asymmetric C–S–C deformation and thiophene ring deformation vibrations, respectively. Judging from these data, a PT layer was successfully deposited on the surface of silica nanoparticle.
